1 **Diverse flanking sequence types of *bla*<sub>NDM</sub> in IncX3 and IncB/O/K/Z plasmids in *Escherichia***

2 ***coli* isolated from poultry**

3 Jia-Hang Zhu<sup>a,b</sup>, Run-Mao Cai<sup>a,b</sup>, Li-Juan Zhang<sup>a,b</sup>, Xing-Run Zheng<sup>a,b</sup>, Yue-Wei Lu<sup>a,b</sup>, Qiu-Yun

4 Zhao<sup>a,b</sup>, Man-Xia Chang<sup>a,b</sup>, Hong-Xia Jiang<sup>a,b</sup>

5 Provincial Key Laboratory of Veterinary Pharmaceutics Development and Safety Evaluation<sup>a</sup>,

6 National Risk Assessment Laboratory for Antimicrobial Resistance of Animal Original Bacteria<sup>b</sup>,

7 South China Agricultural University, Guangzhou, Guangdong, People's Republic of China

8

9 **Abstract** We identified 33 *bla*<sub>NDM</sub>-harboring *Escherichia coli* in 470 poultry samples from

10 Shandong and Guangdong provinces during 2016 to 2017 and included the subtypes *bla*<sub>NDM-1</sub>,

11 *bla*<sub>NDM-5</sub> and *bla*<sub>NDM-9</sub>. The *bla*<sub>NDM</sub> gene possessed by all strains was plasmid-borne and ranged in

12 size from 46 to 265 kb. The plasmids included the replicon types IncX3, IncY, IncB/O/K/Z and

13 IncHI2 and most were transferable and stable in recipient host bacteria. Sequences flanking

14 *bla*<sub>NDM</sub> in IncX3 and IncB/O/K/Z plasmids were diverse and the mobile element IS26 played an

15 important role in the evolution of the IncB/O/K/Z *bla*<sub>NDM</sub> plasmids.

16 **Keywords:** carbapenems, *bla*<sub>NDM</sub>, *Escherichia coli*, plasmids, fitness cost, genetic environment

17

18 Transmissible carbapenem-resistance and its dissemination in the *Enterobacteriaceae* have

19 posed a major threat to global public health (1). In the existing 3 classes of carbapenemases, New

20 Delhi metallo-beta-lactamases (NDM) encoded by *bla*<sub>NDM</sub> is most abundant globally and its

21 presence is increasing at an alarming rate in Asia (2, 3). The *bla*<sub>NDM</sub> gene has been found primarily

22 on plasmids with numerous replicon types including IncF, IncL/M, IncA/C, IncX, IncH, IncN,

23 IncR, IncB/O and IncT (4, 5). In addition, this gene is often flanked by mobile genetic elements  
24 such as insertion sequences and transposons that are responsible for horizontal genetic exchange  
25 and therefore promote the acquisition and spread of resistance genes (4). The presence of  
26 carbapenemase-producing *Enterobacteriaceae* (CPE) in livestock animals is of particular concern  
27 because this may facilitate gene pool expansion from which pathogenic bacteria can pick up  
28 resistance genes, and consumers may subsequently be exposed through the food chain (6). The  
29 presence of *bla*<sub>NDM</sub>-harboring isolates is rapidly increasing among food animals in China and this  
30 is most likely related to the presence of *bla*<sub>NDM</sub>-harboring plasmids (7-13). We therefore examined  
31 *bla*<sub>NDM</sub>-harboring plasmids from poultry in Guangdong and Shandong provinces in China.

32 We collected 470 organ samples from five unrelated areas during 2016 in Shandong and 2017  
33 in Guangdong (Table S1). *Escherichia coli* strains were isolated on MacConkey agar plates and  
34 were further identified by matrix-assisted laser desorption/ionization time of flight mass  
35 spectrometry (MALDI-TOF MS) and 16S rRNA gene sequencing (14). The *bla*<sub>NDM</sub> gene was  
36 identified using the PCR method as previously described (15, 16). We found 33 *bla*<sub>NDM</sub>-harboring  
37 *E. coli* strains in our sample group and 9 were from Shandong and 24 were from Guangdong. Of  
38 the 33 strains, three *bla*<sub>NDM</sub> subtypes were identified including *bla*<sub>NDM-1</sub> (1/33), *bla*<sub>NDM-5</sub> (24/33)  
39 and *bla*<sub>NDM-9</sub> (8/33) (Fig. 1). Antimicrobial susceptibilities of these strains were determined using  
40 the agar dilution method according to CLSI guidelines. All 33 isolates were resistant to at least  
41 four classes of antibiotics including carbapenems (Table S2). Additional PCR screening for the  
42 presence of other resistance genes demonstrated that all *bla*<sub>NDM</sub>-harboring *E. coli* co-harbored  
43 other resistance genes and 10 of which co-harbored polymyxin resistance gene *mcr-1* (Table S3  
44 and Fig 1). Pulsed-field gel electrophoresis (PFGE) analysis identified the presence of 19 clusters

45 at 85% identity (17) (Fig 1).

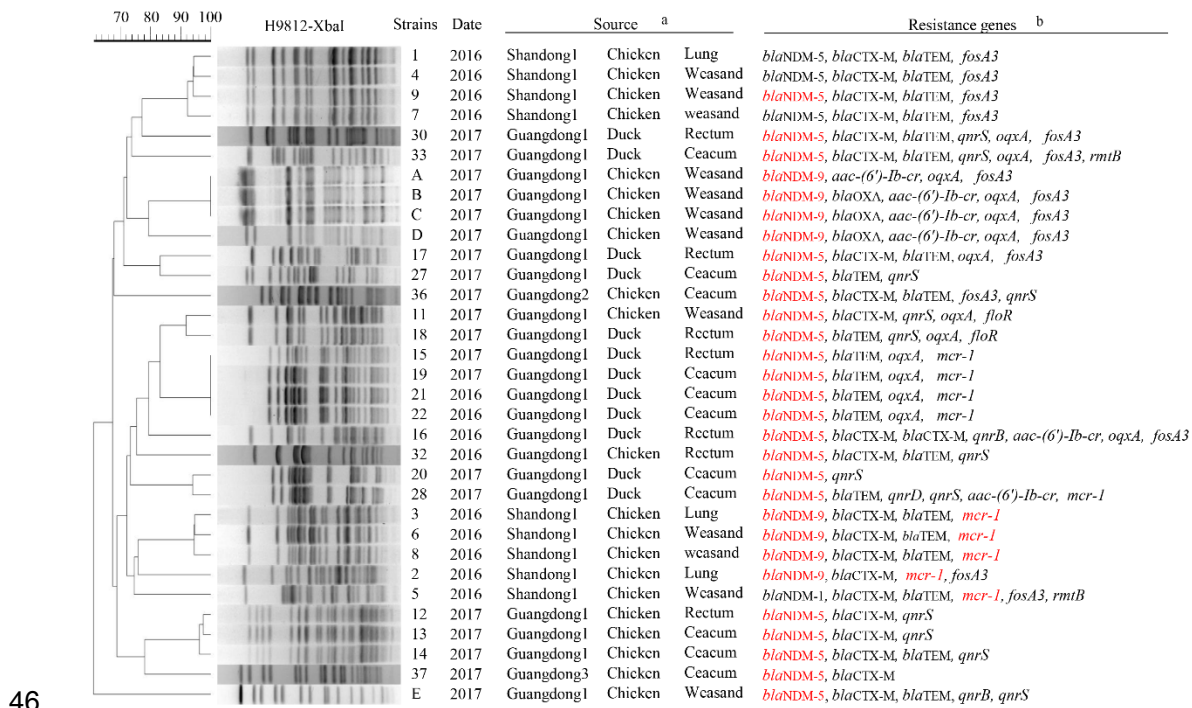

47 **Figure 1.** PFGE patterns and resistance genes of 33 *bla*NDM-harboring *E. coli* strains. <sup>a</sup> Shandong1,  
 48 Guangdong1, Guangdong2 and Guangdong3 represent four different areas in Shandong and  
 49 Guangdong provinces. <sup>b</sup> Genes shown in red color represent that it could be transferred through  
 50 conjugation.

51 Conjugation assays were performed with the 33 *bla*NDM strains as previously described using  
 52 *E. coli* J53 as the recipient (18). Transconjugants harboring *bla*NDM and *mcr-1* were selected on  
 53 MacConkey agar / sodium azide (150 µg/mL) plates that also contained either meropenem (0.3  
 54 µg/mL) or colistin (0.5 µg/mL), respectively. All transconjugants were confirmed by PCR and  
 55 Enterobacterial repetitive intergenic consensus (ERIC) PCR assays (19). The *bla*NDM gene from  
 56 29/33 strains was successfully transferred, as was *mcr-1* in 5/10 of the *mcr-1*-harboring strains  
 57 (Fig. 1 and Table 1). The plasmids carrying *bla*NDM were characterized by PCR-based replicon  
 58 typing (PBRT) (20, 21), S1 nuclease PFGE and Southern hybridization (18, 22). The *bla*NDM genes  
 59 were all located on plasmids of different replicon types that included IncB/O, IncY, IncX3 and

60 IncHI2 with sizes from 46 to 265 kb (Table 1).

61 The fitness of different *bla*<sub>NDM</sub>-harboring plasmids was tested *via* stability and competition  
 62 experiments as previously described (23, 24). Plasmid DNA from transconjugants were extracted  
 63 using plasmid minikits (Qiagen, Hilden, Germany) and then electroporated into *E. coli* DH5 $\alpha$   
 64 except for the plasmid from strain 33 that failed. Each transformant was confirmed to contain a  
 65 single plasmid by S1 nuclease PFGE. Transconjugants harboring *bla*<sub>NDM</sub> were selected on  
 66 Luria-Bertani agar plates containing cefotaxime (1  $\mu$ g/mL) and incubated 8 days for stability  
 67 assays and 12 days for competition assays. Except for the replicon HI2 type plasmids, the  
 68 remainders were stable and persistent in their host strains without reduced fitness (Table 1), these  
 69 are conditions conducive to the dissemination of *bla*<sub>NDM</sub>.

70 Table 1. Characteristics of *bla*<sub>NDM</sub>-harboring plasmids among *E. coli* isolates

| Replicon type | Size (~ kb) | <i>bla</i> <sub>NDM</sub> | Conjugation transfer | Conjugation frequency <sup>a</sup> | Host strains <sup>b</sup>                                                    | Plasmid stability | Relative competitive fitness |                 |
|---------------|-------------|---------------------------|----------------------|------------------------------------|------------------------------------------------------------------------------|-------------------|------------------------------|-----------------|
|               |             |                           |                      |                                    |                                                                              |                   | Value                        | SD <sup>c</sup> |
| IncB/O/K/Z    | 105         | -9                        | +                    | $1.93 \times 10^{-2}$              | 2                                                                            | 100%              | 1.36                         | 0.0875          |
| IncB/O/K/Z    | 115         | -9                        | +                    | $8.62 \times 10^{-4}$              | <u>3</u> , 6, <u>8</u>                                                       | 100%              | 1.21                         | 0.1420          |
| IncY          | 120         | -1                        | -                    | N.A                                | 5                                                                            | 100%              | 0.99                         | 0.0128          |
| IncX3         | 46          | -5                        | -                    | N.A                                | 1, 4, 7<br>9, 11, 12, 13, 14, <u>15</u> , 16,                                | 100%              | 0.98                         | 0.0427          |
| IncX3         | 46          | -5                        | +                    | $7.14 \times 10^{-4}$              | 17, 18, <u>19</u> , 20, <u>21</u> , <u>22</u> , 27,<br>28, 30, 32, E, 36, 37 | 100%              | 0.98                         | 0.0369          |
| IncHI2        | 265         | -5                        | +                    | N.D                                | 33                                                                           | N,D               | N,D                          | N,D             |
| IncHI2        | 260         | -9                        | +                    | $7.59 \times 10^{-6}$              | A, B, C, D                                                                   | 93.3%             | 0.84                         | 0.0894          |

71 <sup>a</sup> N.D, not detected. N.A, not applicable. <sup>b</sup> Flanking sequences of *bla*<sub>NDM</sub> in strains 3 and 8 were similar  
 72 to each other but differed from isolate 6. Flanking sequences of *bla*<sub>NDM</sub> in strains 15, 19, 21, 22 were  
 73 also similar to each other. The flanking sequences of *bla*<sub>NDM</sub> in the other IncX3 plasmid-harboring  
 74 strains were similar. <sup>c</sup> SD, standard deviation.

75

76 We sequenced the *bla*<sub>NDM</sub>-harboring plasmids of the replicon IncB/O type (105 and 115 kb)  
77 and the IncX3 type using the Illumina Hiseq platform (Majorbio, Shanghai) and assembled data  
78 using SOAP denovo. Gaps were closed through PCR and Sanger sequencing. Plasmid sequences  
79 were analyzed using BLAST (<http://blast.ncbi.nlm.nih.gov/Blast.cgi>) and plasmid replicon types  
80 were analyzed using the PlasmidFinder tool (<https://cge.cbs.dtu.dk/services/PlasmidFinder/>). PCR  
81 primers were designed to detect the *bla*<sub>NDM</sub> genetic environment of similar plasmids (Tables S4  
82 and S5).

83 Two types of sequences flanking *bla*<sub>NDM</sub> were found in the IncX3 plasmids that were  
84 assigned the names pNDM-T16 and pNDM-T21. Plasmid pNDM-T16 was 46161 bp and almost  
85 100% identical to plasmid pNDM5\_IncX3 (KU761328) with only 6 single-base changes, in which  
86 the *ISAbal25* sequence adjacent to *bla*<sub>NDM-5</sub> was interrupted by IS5 and split into two fragments.  
87 The sequence of pNDM-T21 has not been reported previously and downstream of IS5 was a  
88 truncated *IS3000* transposase gene that most likely was the product of intramolecular  
89 recombination (Figure S2). This discovery gives further evidence for the diversity of the sequence  
90 types for IncX3 *bla*<sub>NDM</sub>-harboring plasmids as reported previously (25-27).

91 The IncB/O plasmids were identified as IncB/O/K/Z plasmids using the PlasmidFinder tool.  
92 Three kinds of sequences flanking *bla*<sub>NDM</sub> were found and the plasmids were assigned the names  
93 pNDM-T2, pNDM-T3 and pNDM-T6. The major genetic organization surrounding *bla*<sub>NDM-9</sub> in  
94 these plasmids was similar to that in the plasmids pHNTH02-1 (MG196294) and  
95 p5CRE51-NDM-9 (CP021177). All 5 plasmids possessed *IS26-intI1-dfrA12-qacEAl-sulI*  
96 *-ISCR1-(ΔIS1294)-Δdct-tat-trpF-ble<sub>MBL</sub>-bla<sub>NDM</sub>-ΔISAbal25-IS26* and this IS26 composite  
97 transposon was most likely responsible for *bla*<sub>NDM</sub> transfer (28) (Fig. 2).

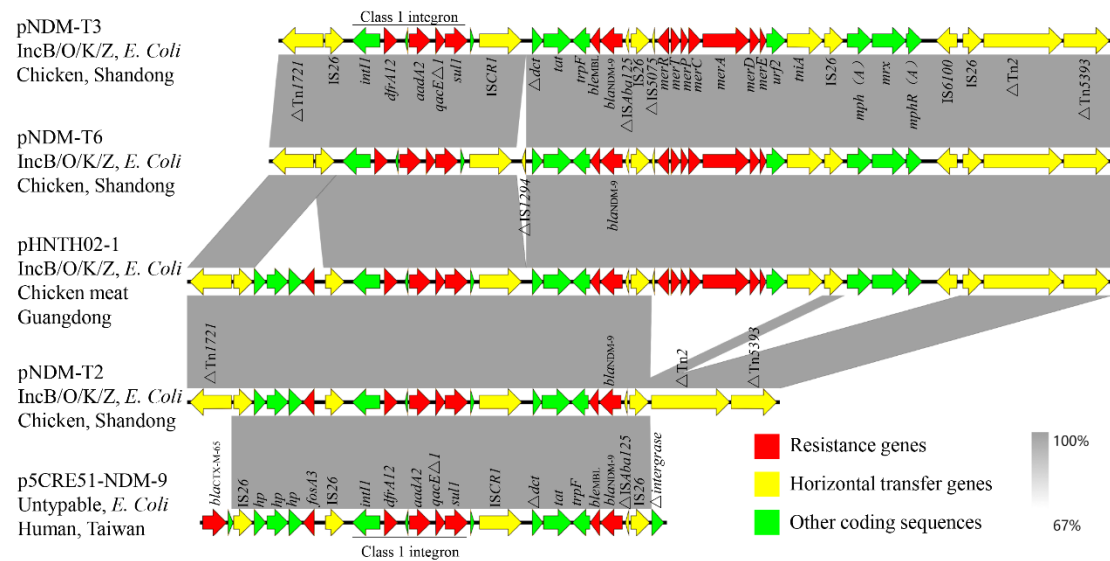

98

99 **Figure 2.** Comparison of the *bla*<sub>NDM</sub> genetic environment in pNDMT-2 and pNDMT-6 with other  
100 plasmids.

101 The sequences surrounding the *bla*<sub>NDM-9</sub> genes were diverse and was most likely the result of  
102 the action of the IS26 mobile element. We therefore designed specific PCR primers to detect  
103 circular intermediates (circle A-D) and other possible structures (structure A-G) mediated by IS26  
104 in three IncB/O/K/Z plasmids (Table S6 and Fig3). The PCR products were confirmed by Sanger  
105 sequencing and we found only one cyclic intermediate formed by IS26-*mph(A)*-*mrx*-*mphR(A)*  
106 -IS6100-IS26. Interestingly, the A-G structures were all detected although no direct repeats were  
107 found adjacent to the IS26 insertions. These results demonstrated there were various plasmids  
108 possessed different genetic organizations surrounding *bla*<sub>NDM-9</sub> in the host bacteria, and all were  
109 derived from a larger plasmid via IS26 transposition. Remarkably, even though the circular  
110 intermediates containing *bla*<sub>NDM</sub> were not detected in these plasmids, IS26-*intI1*-*dfrA12*-*qacEΔ1*-  
111 *sul1*-*ISCR1*-*Δdct*-*tat*-*trpF*-*ble*<sub>MBL</sub>-*bla*<sub>NDM</sub>-*ΔISAbal25*-IS26 has also been found in IncA/C2  
112 (pNDM-2248, CP021177), IncHI2-N (pC629, CP015725) and IncFII(Y)-like (pKPGJ-1a,  
113 CP017283.1) plasmids that originated from *E. coli*, *Salmonella* Indiana, and *Klebsiella variicola*,

114 respectively (28, 29). This suggests the possible transfer of *bla*<sub>NDM</sub> between different plasmids  
 115 mediated through IS26-mediated composite transposon.

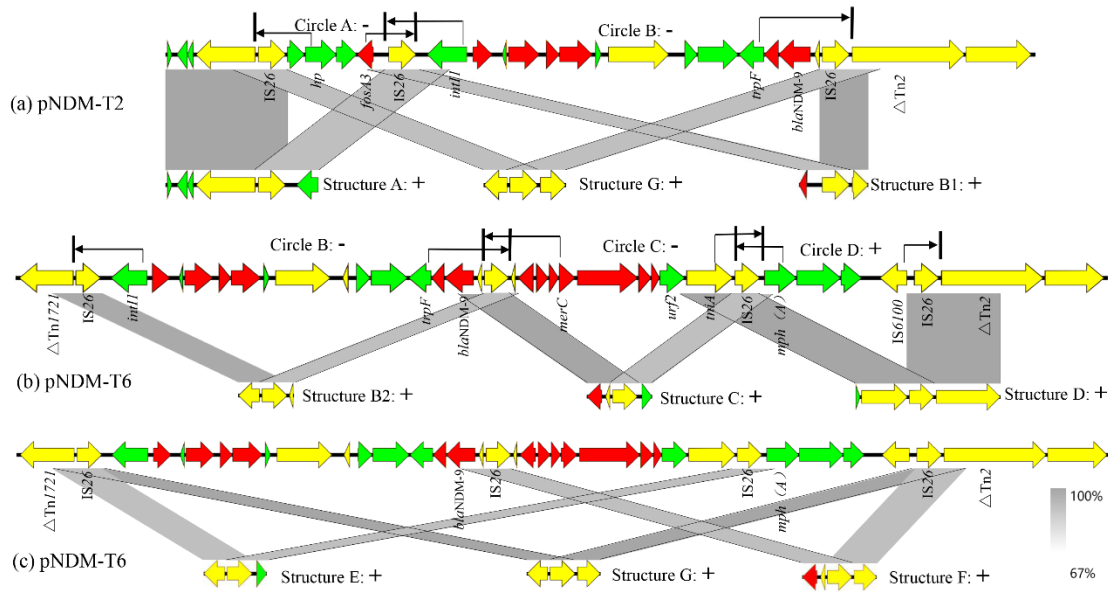

116  
 117 **Figure 3.** Circular intermediates and possible structures present in the IncB/O/K/Z plasmids found  
 118 in this study.

119 In conclusion, this study demonstrated that the dissemination of *bla*<sub>NDM</sub> among poultry is  
 120 closely related to diverse plasmids, especially the IncX3 and IncB/O/K/Z conjugative plasmids.  
 121 The sequences flanking *bla*<sub>NDM</sub> in IncB/O/K/Z as well as in IncX3 plasmids, tended to be diverse  
 122 and was most likely the result of intramolecular recombination and frequent activity of mobile  
 123 elements such as IS26. These events resulted in new types of *bla*<sub>NDM</sub>-harboring plasmids and are  
 124 related to the process of evolution for the *bla*<sub>NDM</sub>-harboring plasmids over time. Given the  
 125 continued spread of *bla*<sub>NDM</sub> gene and the significant role that mobile elements and cyclic  
 126 intermediates played in the evolution and dissemination of resistance plasmids (2, 30), further  
 127 studies concerning the molecular mechanisms behind the dissemination of *bla*<sub>NDM</sub> are urgently  
 128 needed.

129

130       **Accession numbers** The complete nucleotide sequences of the three *bla*<sub>NDM</sub>-carrying  
131 plasmids characterized in this study were submitted to GenBank under accession numbers  
132 MN335919 (pNDM-T2), MN335921 (pNDM-T6), MN335922 (pNDM-T16), and the annotated  
133 sequences of the *bla*<sub>NDM</sub> genetic environment identified from strain 3 and strain 21 have been  
134 submitted to GenBank under accession number MN335920 (pNDM-T3), MN307121  
135 (pNDM-T21), respectively.

136

#### 137 SUPPLEMENTAL MATERIAL

138 Supplemental file 1, PDF file, .....MB.

#### 139 ACKNOWLEDGMENTS

140       This work was supported in part by the National Natural Science Foundation of China  
141 (31972734) and National key research program of China (grant 2016YFD0501300).

#### 142 FUNDING INFORMATION

143       This work was funded by the National Natural Science Foundation of China (31972734) and  
144 National key research program of China (grant 2016YFD0501300).

145

#### 146 REFERENCES:

- 147 1.       van Duin D, Doi Y. 2017. The global epidemiology of carbapenemase-producing  
148       *Enterobacteriaceae*. *Virulence* 8:460-469.
- 149 2.       Logan LK, Weinstein RA. 2017. The Epidemiology of Carbapenem-Resistant  
150       *Enterobacteriaceae*: The Impact and Evolution of a Global Menace. *J Infect Dis*  
151       215:S28-S36.



- 152 3. Khan AU, Maryam L, Zarrilli R. 2017. Structure, Genetics and Worldwide Spread of New  
153 Delhi Metallo-beta-lactamase (NDM): a threat to public health. BMC Microbiol 17:101.
- 154 4. Partridge SR, Kwong SM, Firth N, Jensen SO. 2018. Mobile Genetic Elements  
155 Associated with Antimicrobial Resistance. Clin Microbiol Rev 31.
- 156 5. Liu BT, Song FJ, Zou M, Hao ZH, Shan H. 2017. Emergence of Colistin Resistance Gene  
157 *mcr-1* in *Cronobacter sakazakii* Producing NDM-9 and in *Escherichia coli* from the Same  
158 Animal. Antimicrob Agents Chemother 61.
- 159 6. Kock R, Daniels-Haardt I, Becker K, Mellmann A, Friedrich AW, Mevius D, Schwarz S,  
160 Jurke A. 2018. Carbapenem-resistant *Enterobacteriaceae* in wildlife, food-producing, and  
161 companion animals: a systematic review. Clin Microbiol Infect 24:1241-1250.
- 162 7. He T, Wang Y, Sun L, Pang M, Zhang L, Wang R. 2017. Occurrence and characterization  
163 of *bla*<sub>NDM-5</sub>-positive *Klebsiella pneumoniae* isolates from dairy cows in Jiangsu, China. J  
164 Antimicrob Chemother 72:90-94.
- 165 8. Kong LH, Lei CW, Ma SZ, Jiang W, Liu BH, Wang YX, Guan R, Men S, Yuan QW,  
166 Cheng GY, Zhou WC, Wang HN. 2017. Various Sequence Types of *Escherichia coli*  
167 Isolates Coharboring *bla*<sub>NDM-5</sub> and *mcr-1* Genes from a Commercial Swine Farm in China.  
168 Antimicrob Agents Chemother 61.
- 169 9. Lin D, Xie M, Li R, Chen K, Chan EW, Chen S. 2017. IncFII Conjugative  
170 Plasmid-Mediated Transmission of *bla*<sub>NDM-1</sub> Elements among Animal-Borne *Escherichia*  
171 *coli* Strains. Antimicrob Agents Chemother 61.
- 172 10. Liu BT, Song FJ, Zou M, Zhang QD, Shan H. 2017. High Incidence of *Escherichia coli*  
173 Strains Coharboring *mcr-1* and *bla*<sub>NDM</sub> from Chickens. Antimicrob Agents Chemother 61.

- 174 11. Wang Y, Zhang R, Li J, Wu Z, Yin W, Schwarz S, Tyrrell JM, Zheng Y, Wang S, Shen Z,  
175 Liu Z, Liu J, Lei L, Li M, Zhang Q, Wu C, Zhang Q, Wu Y, Walsh TR, Shen J. 2017.  
176 Comprehensive resistome analysis reveals the prevalence of NDM and MCR-1 in  
177 Chinese poultry production. *Nat Microbiol* 2:16260.
- 178 12. Wang R, Liu Y, Zhang Q, Jin L, Wang Q, Zhang Y, Wang X, Hu M, Li L, Qi J, Luo Y,  
179 Wang H. 2018. The prevalence of colistin resistance in *Escherichia coli* and *Klebsiella*  
180 *pneumoniae* isolated from food animals in China: coexistence of *mcr-1* and *bla<sub>NDM</sub>* with  
181 low fitness cost. *Int J Antimicrob Agents* 51:739-744.
- 182 13. Xiang R, Zhang AY, Ye XL, Kang ZZ, Lei CW, Wang HN. 2018. Various Sequence Types  
183 of *Enterobacteriaceae* Isolated from Commercial Chicken Farms in China and Carrying  
184 the *bla<sub>NDM-5</sub>* Gene. *Antimicrob Agents Chemother* 62.
- 185 14. Weisburg WG, Barns SM, Pelletier DA, Lane DJ. 1991. 16S ribosomal DNA  
186 amplification for phylogenetic study. *J Bacteriol* 173:697-703.
- 187 15. Poirel L, Walsh TR, Cuvillier V, Nordmann P. 2011. Multiplex PCR for detection of  
188 acquired carbapenemase genes. *Diagn Microbiol Infect Dis* 70:119-23.
- 189 16. Bonnin RA, Naas T, Poirel L, Nordmann P. 2012. Phenotypic, biochemical, and  
190 molecular techniques for detection of metallo-beta-lactamase NDM in *Acinetobacter*  
191 *baumannii*. *J Clin Microbiol* 50:1419-21.
- 192 17. Jiang HX, Song L, Liu J, Zhang XH, Ren YN, Zhang WH, Zhang JY, Liu YH, Webber  
193 MA, Ogbolu DO, Zeng ZL, Piddock LJ. 2014. Multiple transmissible genes encoding  
194 fluoroquinolone and third-generation cephalosporin resistance co-located in  
195 non-typhoidal *Salmonella* isolated from food-producing animals in China. *Int J*

- 196 Antimicrob Agents 43:242-7.
- 197 18. Zhang WH, Lin XY, Xu L, Gu XX, Yang L, Li W, Ren SQ, Liu YH, Zeng ZL, Jiang HX.  
198 2016. CTX-M-27 Producing *Salmonella enterica* Serotypes Typhimurium and Indiana  
199 Are Prevalent among Food-Producing Animals in China. Front Microbiol 7:436.
- 200 19. Versalovic J, Koeuth T, Lupski JR. 1991. Distribution of repetitive DNA sequences in  
201 eubacteria and application to fingerprinting of bacterial genomes. Nucleic Acids Res  
202 19:6823-31.
- 203 20. Carattoli A, Bertini A, Villa L, Falbo V, Hopkins KL, Threlfall EJ. 2005. Identification of  
204 plasmids by PCR-based replicon typing. J Microbiol Methods 63:219-28.
- 205 21. Johnson TJ, Bielak EM, Fortini D, Hansen LH, Hasman H, Debroy C, Nolan LK,  
206 Carattoli A. 2012. Expansion of the IncX plasmid family for improved identification and  
207 typing of novel plasmids in drug-resistant *Enterobacteriaceae*. Plasmid 68:43-50.
- 208 22. Barton BM, Harding GP, Zuccarelli AJ. 1995. A general method for detecting and sizing  
209 large plasmids. Anal Biochem 226:235-40.
- 210 23. Sandegren L, Linkevicius M, Lytsy B, Melhus A, Andersson DI. 2012. Transfer of an  
211 *Escherichia coli* ST131 multiresistance cassette has created a *Klebsiella*  
212 *pneumoniae*-specific plasmid associated with a major nosocomial outbreak. J Antimicrob  
213 Chemother 67:74-83.
- 214 24. Gagneux S, Long CD, Small PM, Van T, Schoolnik GK, Bohannan BJ. 2006. The  
215 competitive cost of antibiotic resistance in *Mycobacterium tuberculosis*. Science  
216 312:1944-6.
- 217 25. Ho PL, Wang Y, Liu MC, Lai EL, Law PY, Cao H, Chow KH. 2018. IncX3 Epidemic

- 218 Plasmid Carrying *bla*<sub>NDM-5</sub> in *Escherichia coli* from Swine in Multiple Geographic Areas  
219 in China. *Antimicrob Agents Chemother* 62.
- 220 26. Wang Y, Tong MK, Chow KH, Cheng VC, Tse CW, Wu AK, Lai RW, Luk WK, Tsang DN,  
221 Ho PL. 2018. Occurrence of Highly Conjugative IncX3 Epidemic Plasmid Carrying  
222 *bla*<sub>NDM</sub> in *Enterobacteriaceae* Isolates in Geographically Widespread Areas. *Front*  
223 *Microbiol* 9:2272.
- 224 27. Yoon EJ, Kang DY, Yang JW, Kim D, Lee H, Lee KJ, Jeong SH. 2018. New Delhi  
225 Metallo-Beta-Lactamase-Producing *Enterobacteriaceae* in South Korea Between 2010  
226 and 2015. *Front Microbiol* 9:571.
- 227 28. Wang W, Baloch Z, Peng Z, Hu Y, Xu J, Fanning S, Li F. 2017. Genomic characterization  
228 of a large plasmid containing a *bla*<sub>NDM-1</sub> gene carried on *Salmonella enterica* serovar  
229 Indiana C629 isolate from China. *BMC Infect Dis* 17:479.
- 230 29. Di DY, Jang J, Unno T, Hur HG. 2017. Emergence of *Klebsiella variicola* positive for  
231 NDM-9, a variant of New Delhi metallo-beta-lactamase, in an urban river in South Korea.  
232 *J Antimicrob Chemother* 72:1063-1067.
- 233 30. Partridge SR. 2011. Analysis of antibiotic resistance regions in Gram-negative bacteria.  
234 *FEMS Microbiol Rev* 35:820-55.
- 235

# Figure 1

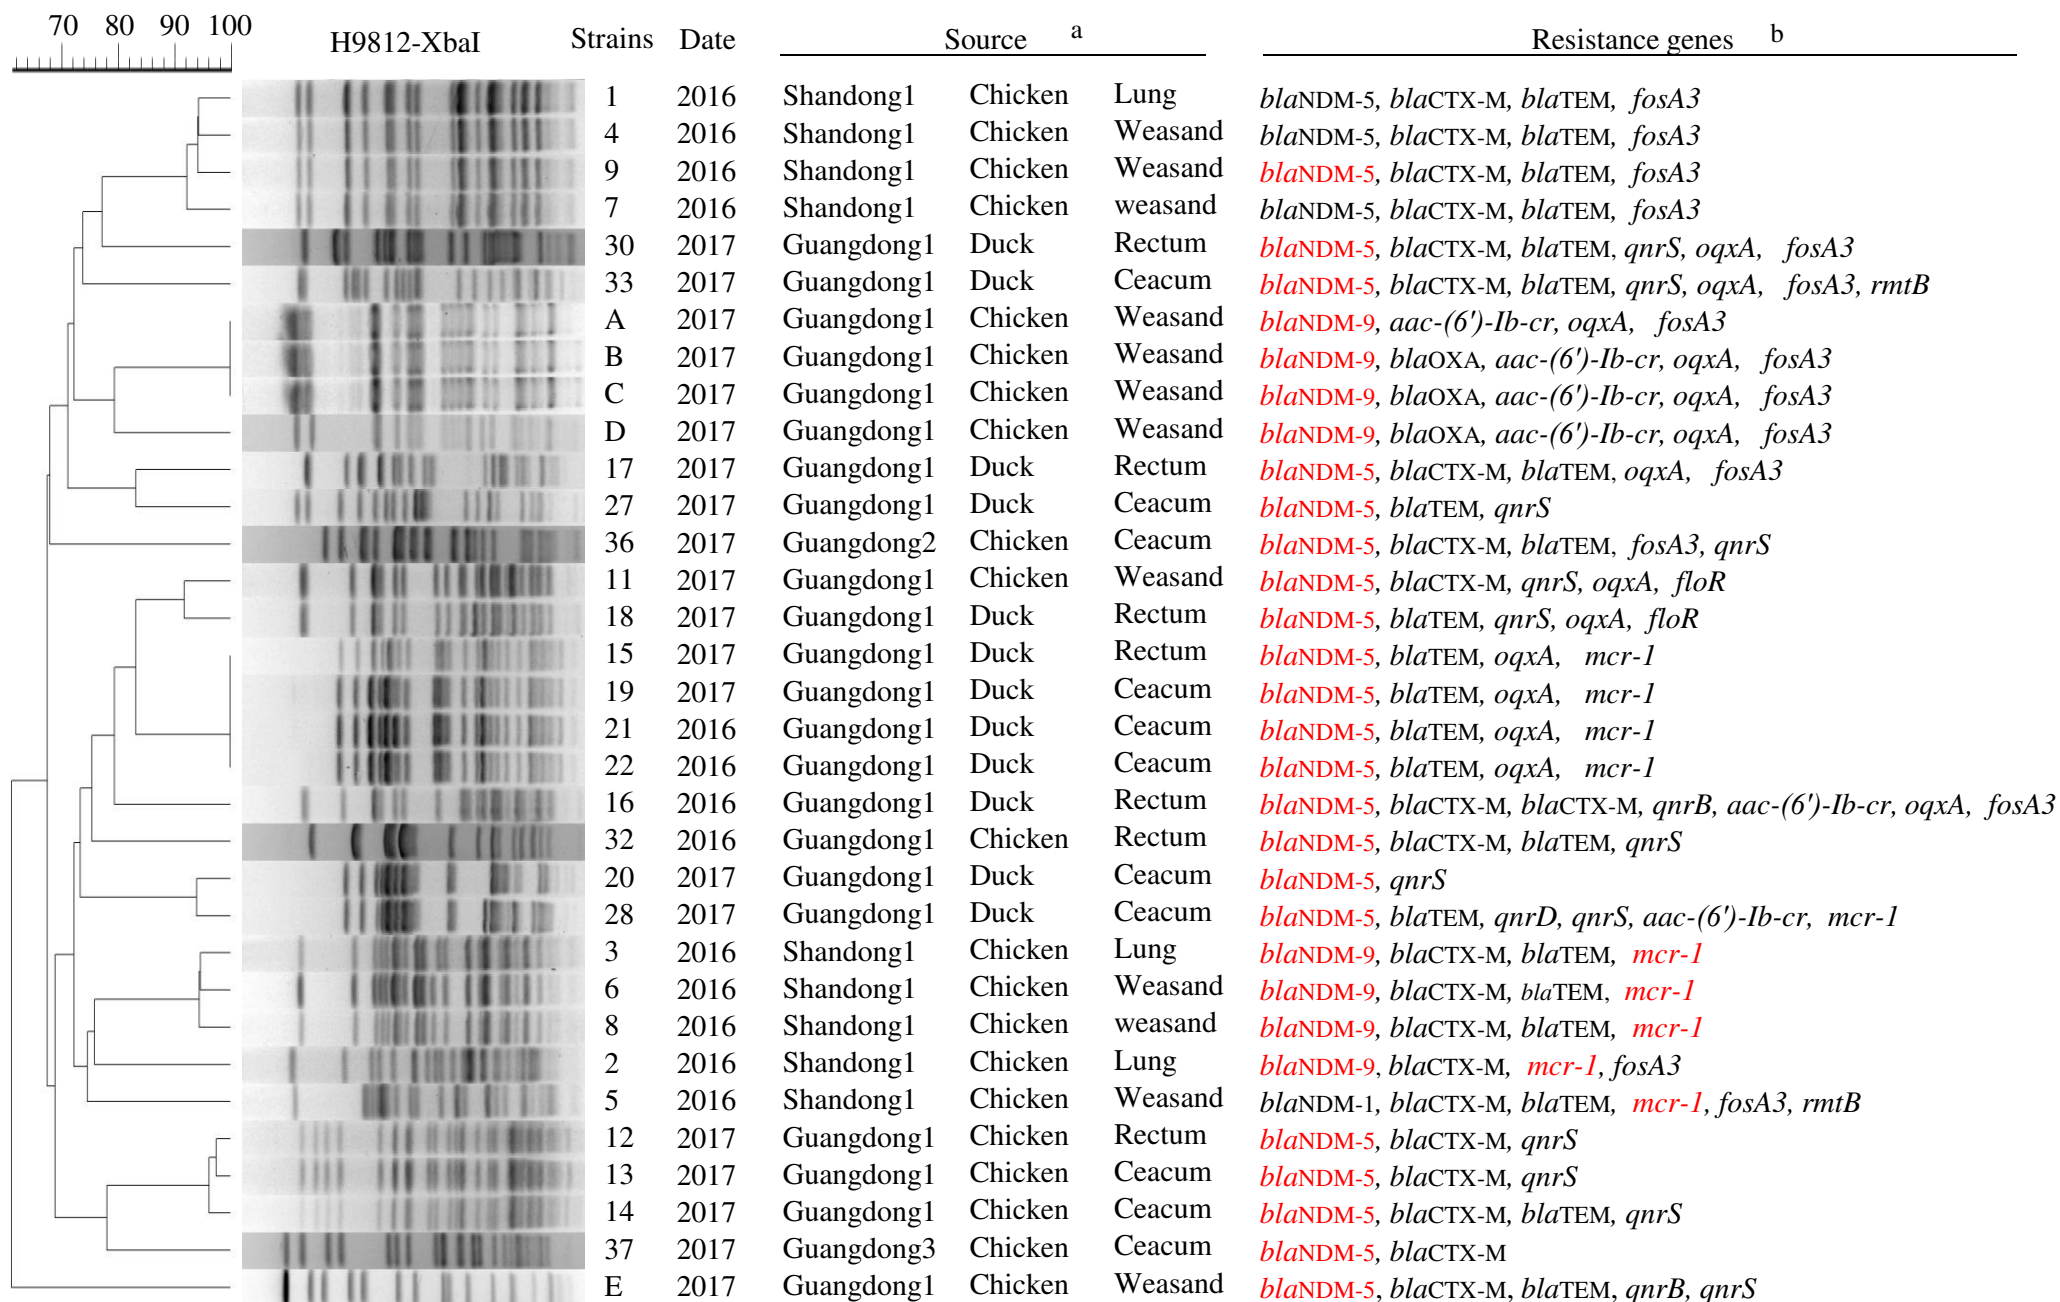

# Figure 2

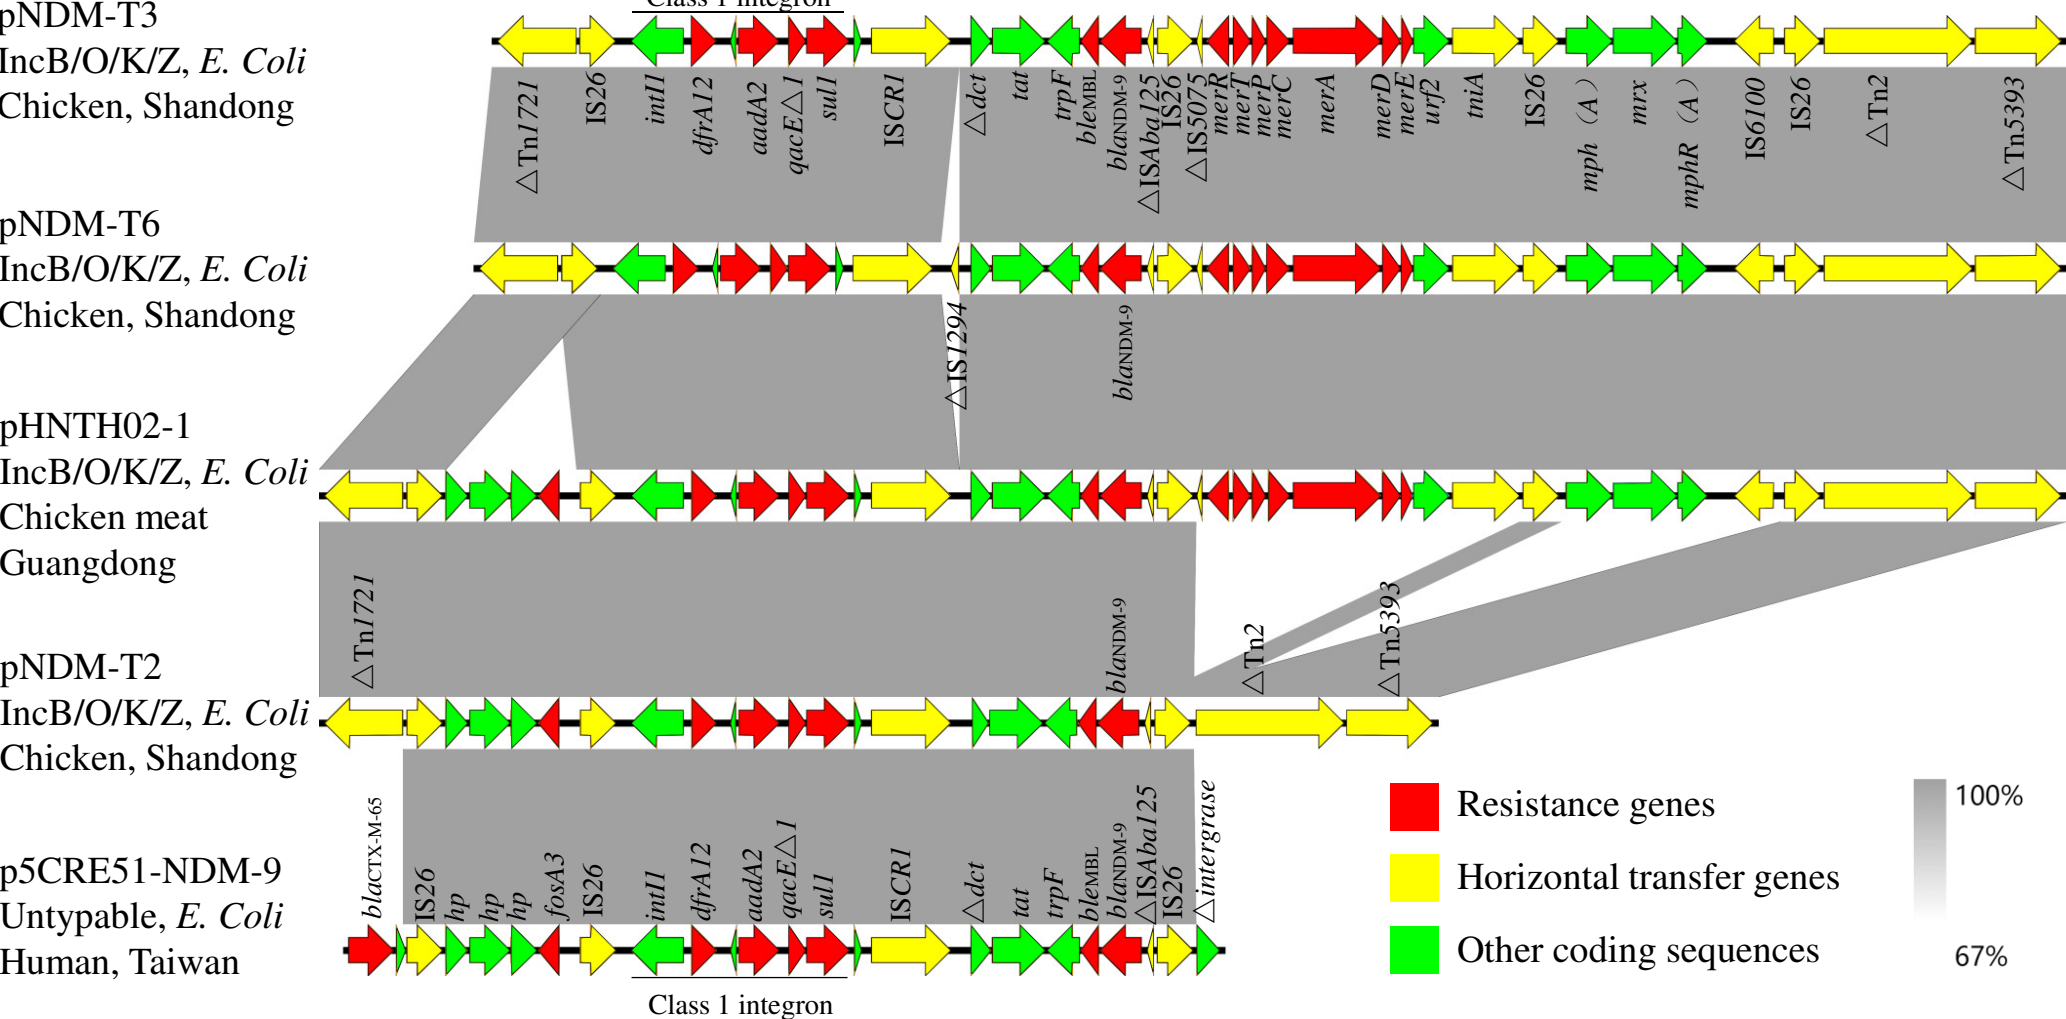

**Figure 3**

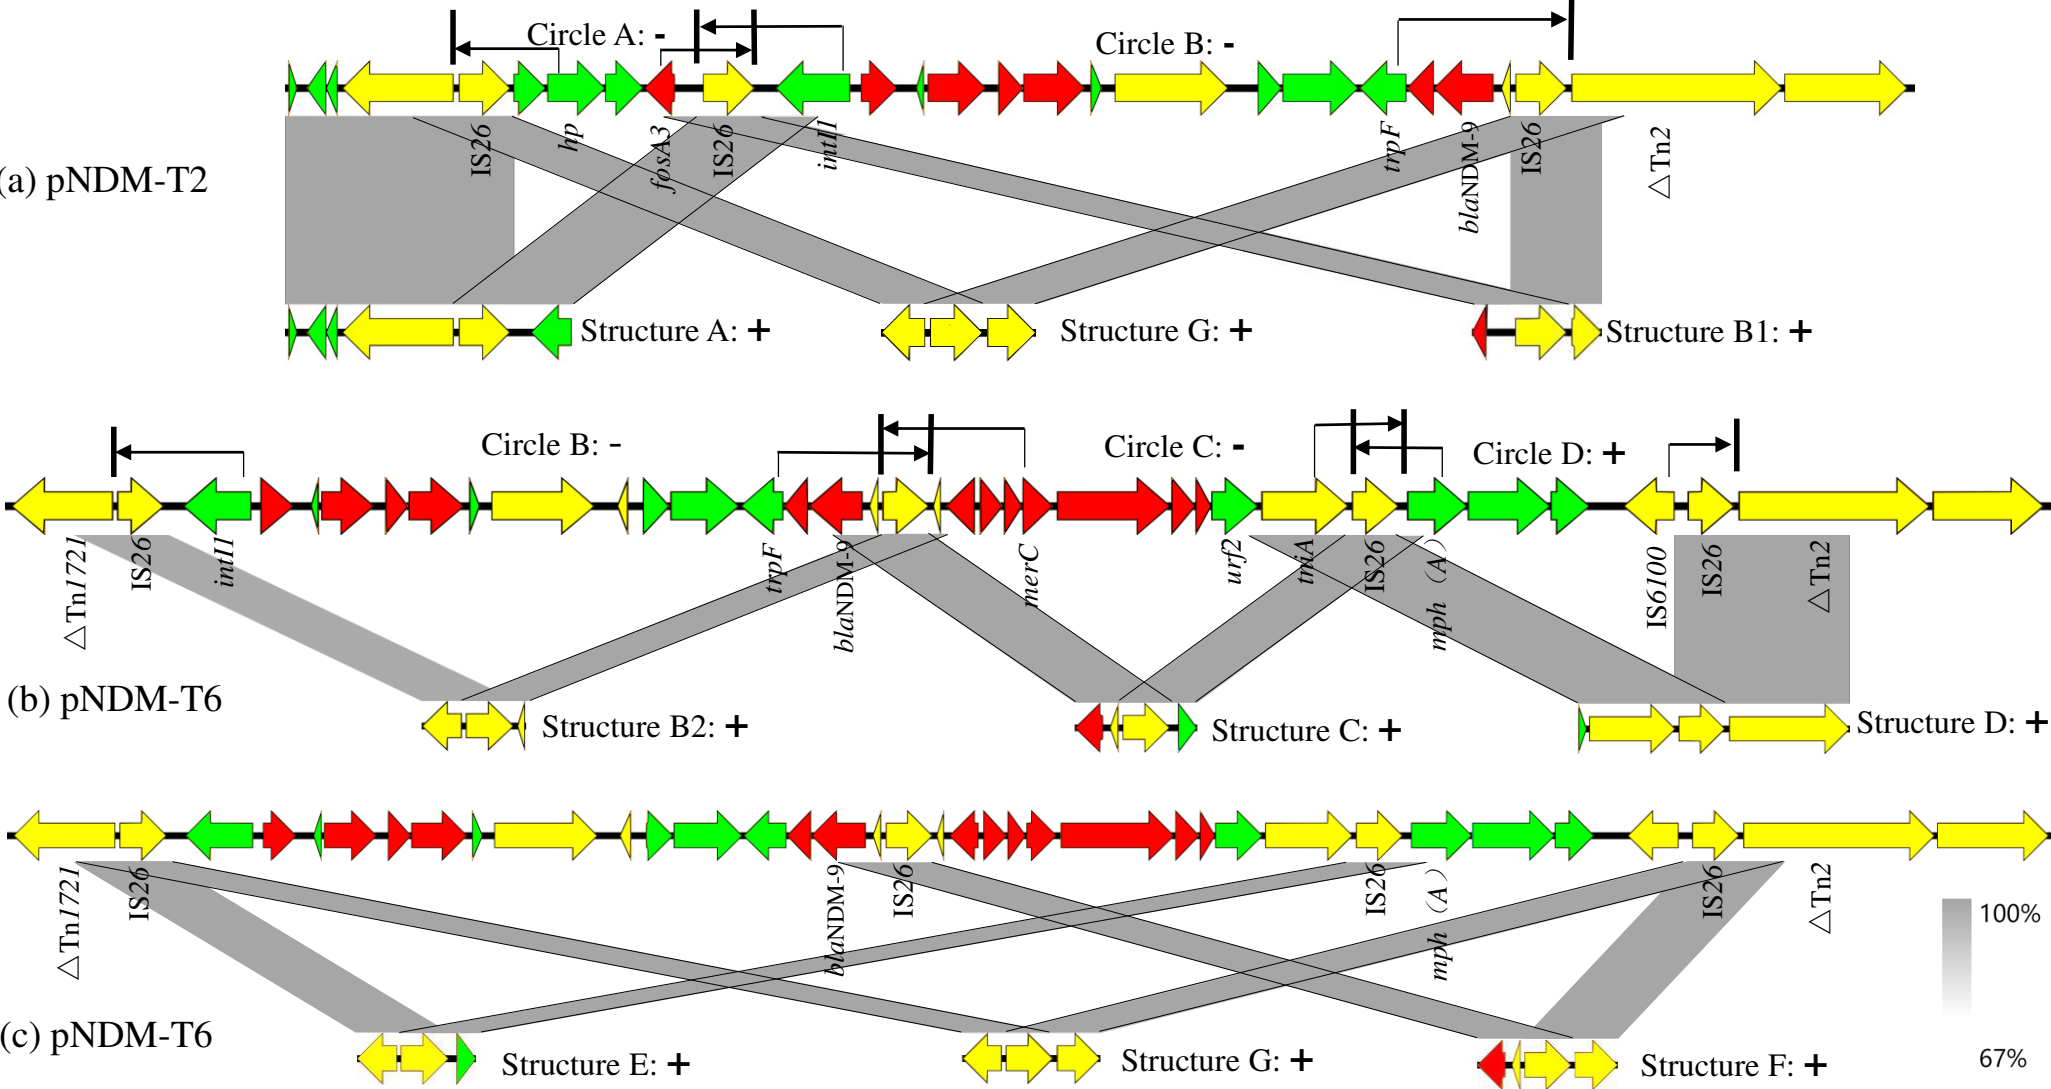

**Figure S1**

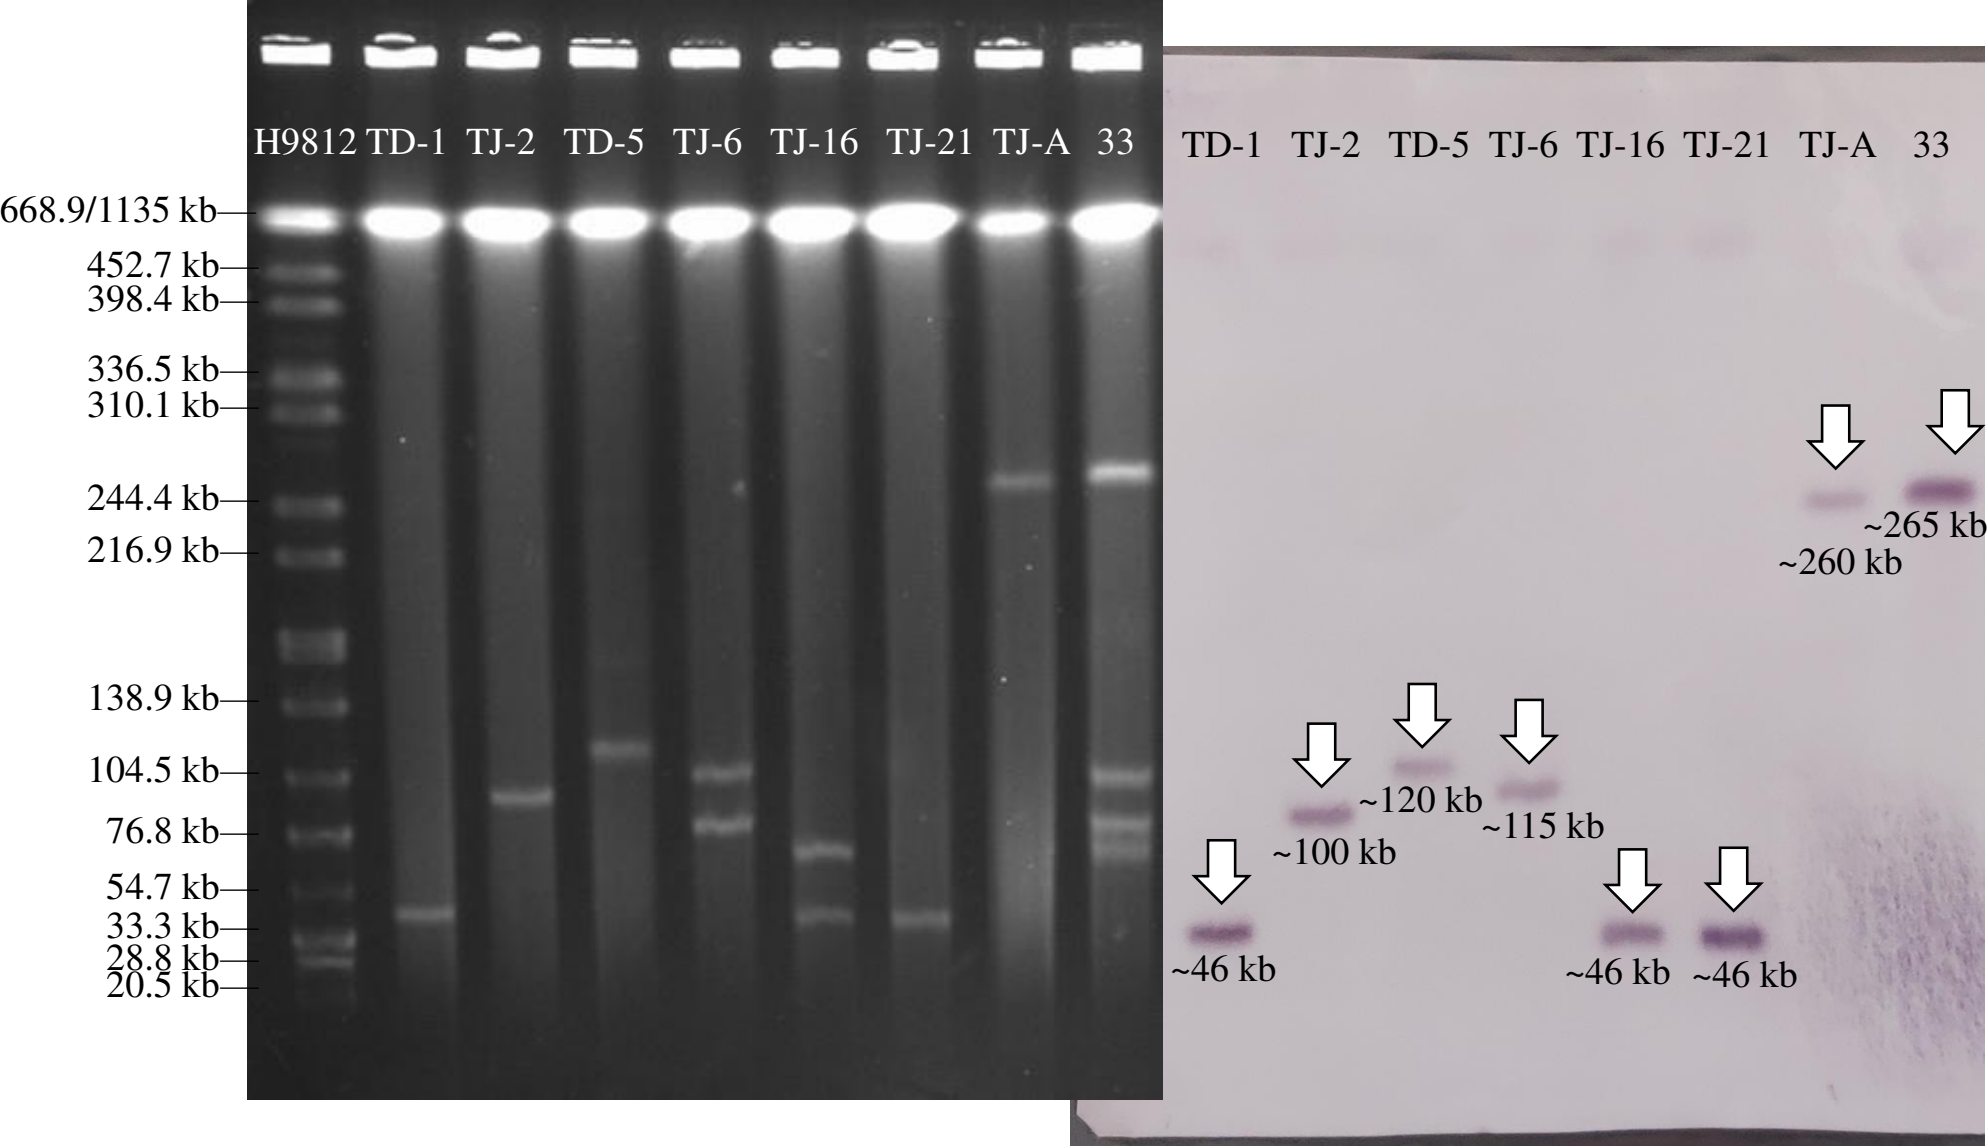



# Figure S2

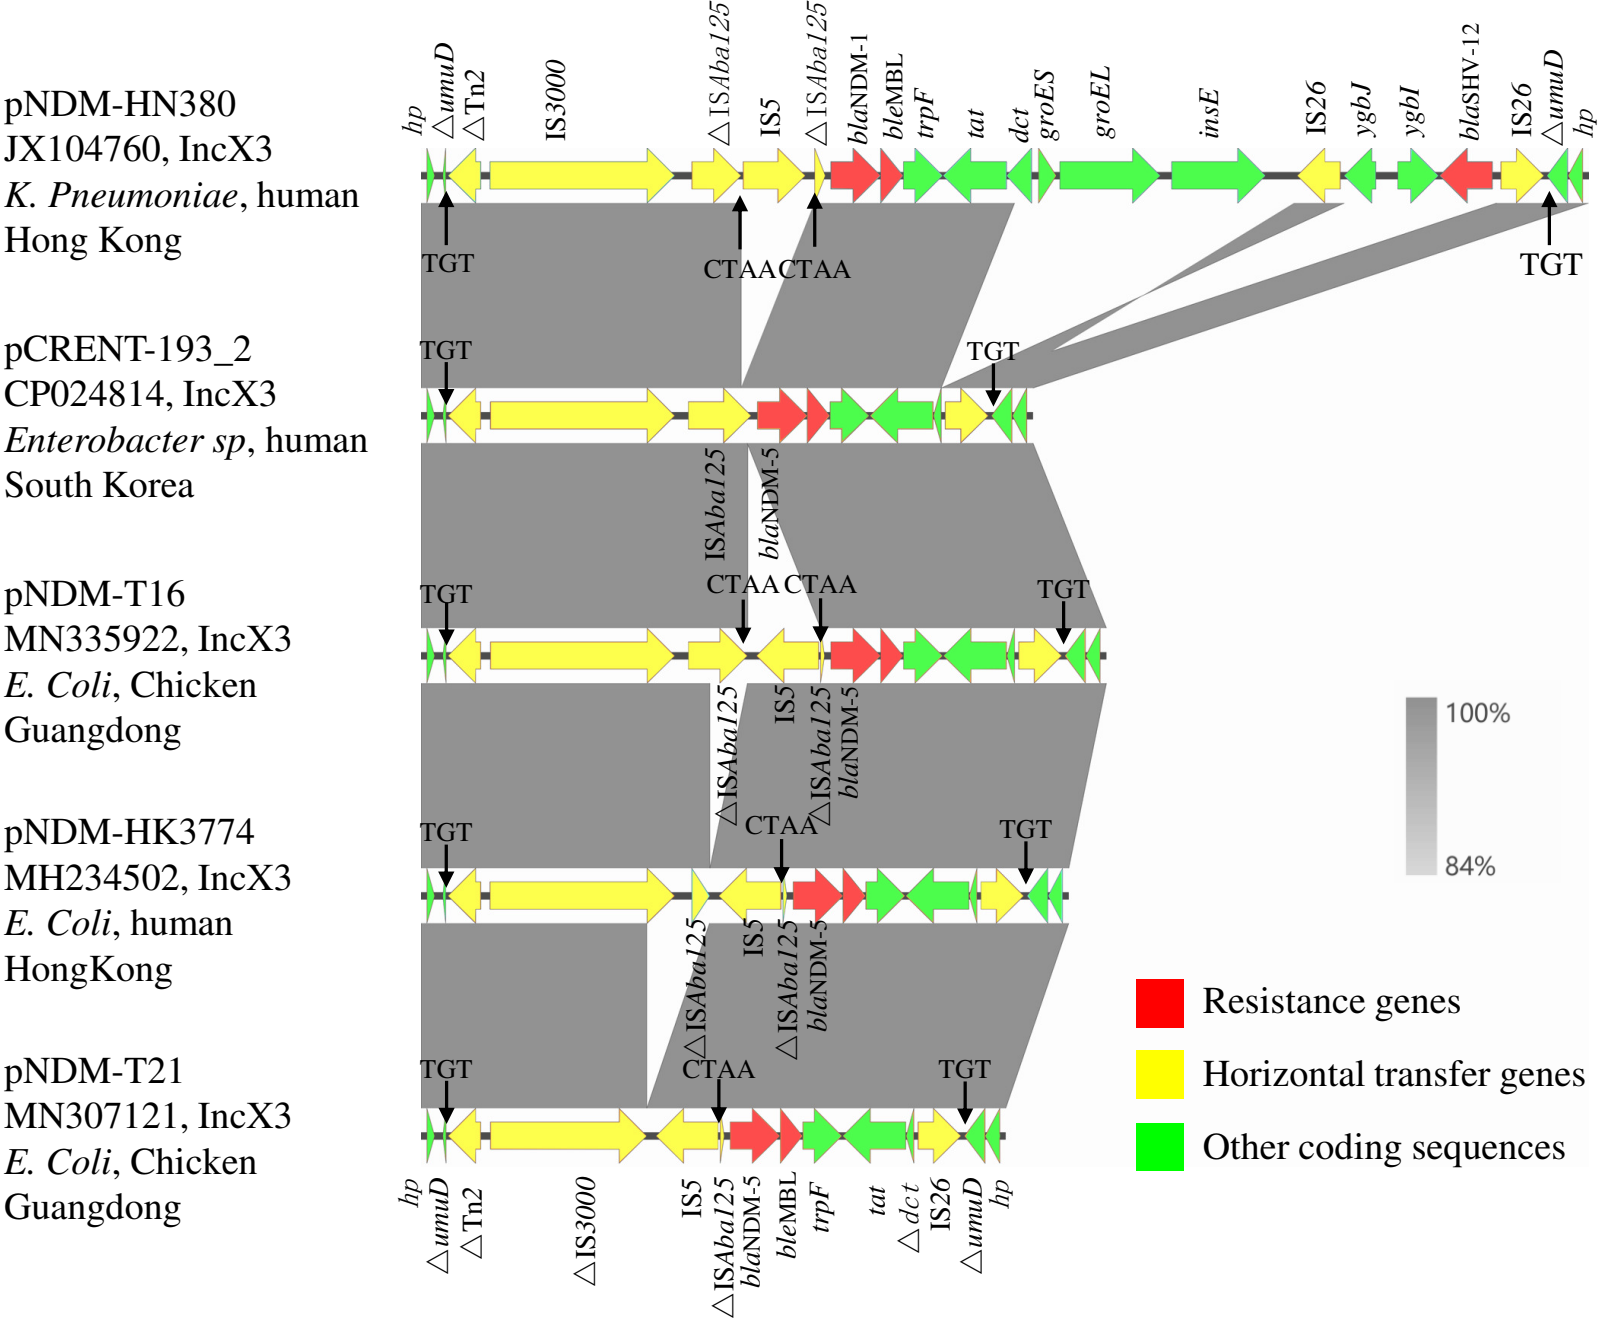

Figure S3

(a) pNDM-T16

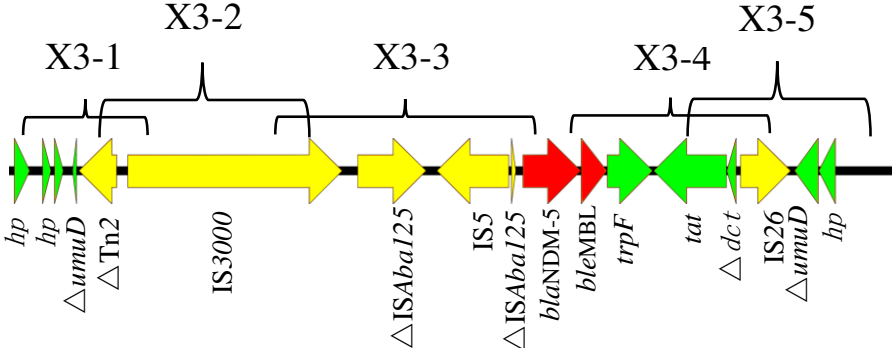

(b) pNDM-T6

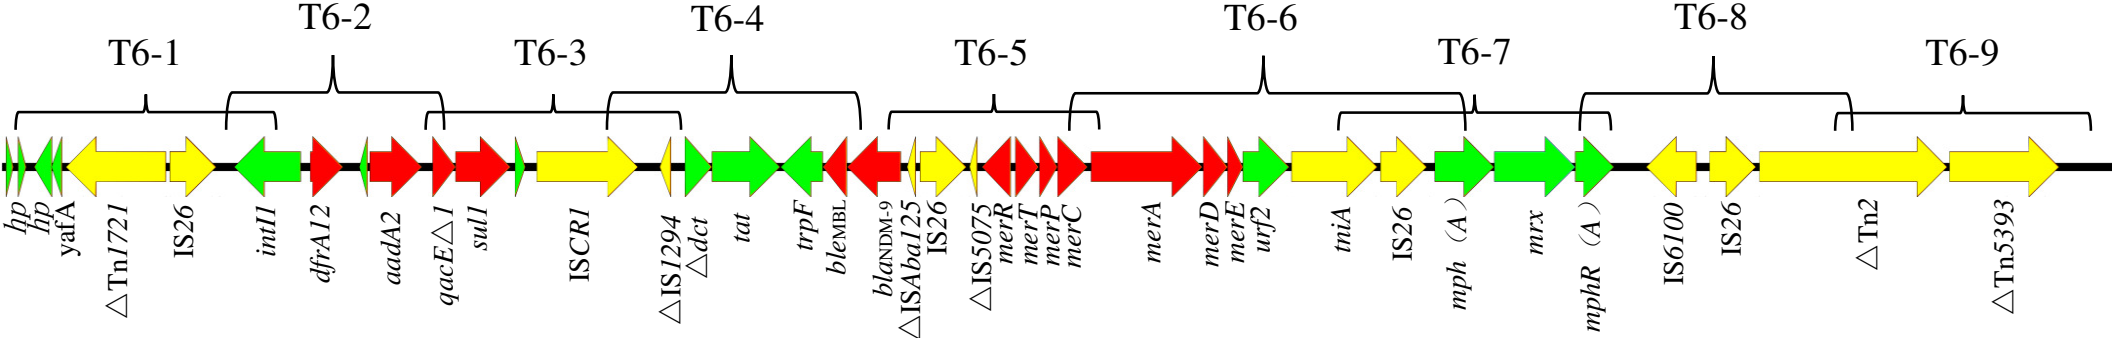

Source: https://www.biorxiv.org/content/10.1101/768622v1.full.pdf
